# Supplementary material for: Photoelectrochemical detection of copper ions based on a covalent organic framework with tunable properties
Source: Royal Society of Chemistry journal article supplement (doi:10.1039/d4an00026a), 2024-01-01
Supplement: d4an00026a1.pdf [file d4an00026a1.pdf]

Supporting Information

**Photoelectrochemical detection of copper ions based on a covalent  
organic framework with tunable properties**

*Jing Li,<sup>‡</sup> Lu Hou,<sup>‡</sup> Yue Jiang, Mei-Jie Wei, Cheng-Shuang Wang, Heng-Ye Li, Fen-Ying Kong\*, Wei Wang\**

*School of Chemistry and Chemical Engineering, Yancheng Institute of Technology, Yancheng 224051,  
China.*

*‡These authors contribute equally*

*\*Corresponding author, email: [kongfy@ycit.cn](mailto:kongfy@ycit.cn), [wangw@ycit.cn](mailto:wangw@ycit.cn)*

## Supporting Figures

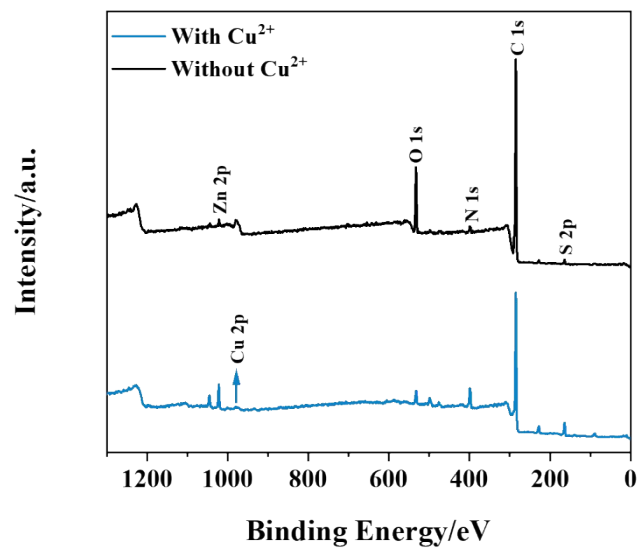

Fig S1. XPS survey spectrum of TT-COF(Zn) and after Cu<sup>2+</sup> treatment.

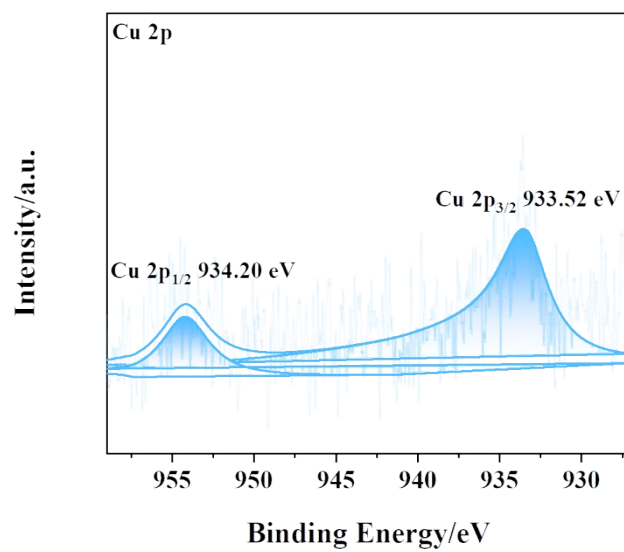

Fig S2. High-resolution XPS spectra of Cu 2p in TT-COF(Zn) of Cu<sup>2+</sup> treatment.
